# Supplementary figures and images for: Automatic leaking carrier canceller adjustment techniques
Source: Springer Nature journal article supplement (doi:10.1186/1687-3963-2013-8), 2013-05-07

Signal Generator

additional  
Power sensor

CCU2

TBC

CCU1

RX

3dB Hybrid

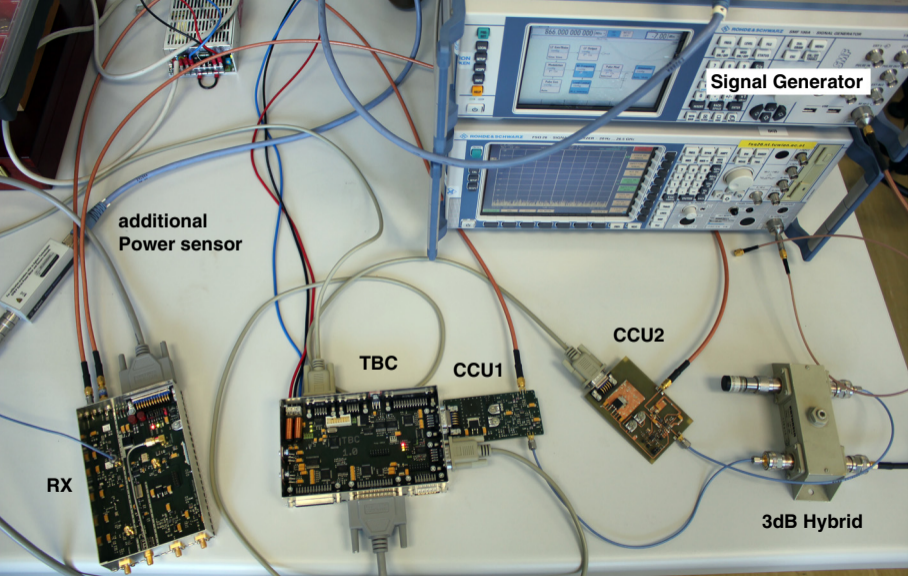

Supplement: 13639_2012_18_MOESM8_ESM.pdf [file 13639_2012_18_MOESM8_ESM.pdf]
